# Supplementary material
Source: MDPI journal article supplement (https://www.mdpi.com/2312-7481/6/2/28)
Supplement: s1 [file s1]

# **Supplementary Materials: Structural Evidence of Spin State Selection and Spin Crossover Behavior of Tripodal Schiff Base Complexes of tris(2-aminoethyl)amine and Related Tripodal Amines**

**Greg Brewer**

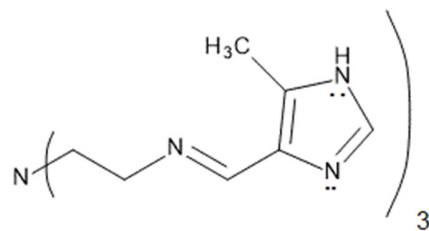

tren(5Me-4ImH)<sub>3</sub>

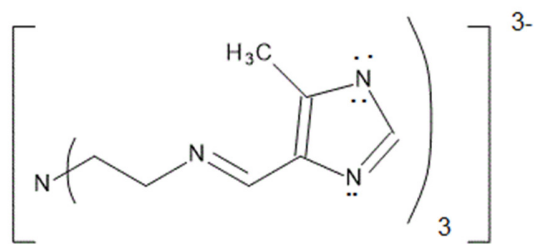

[tren(5Me-4Im)<sub>3</sub>]<sup>3-</sup>

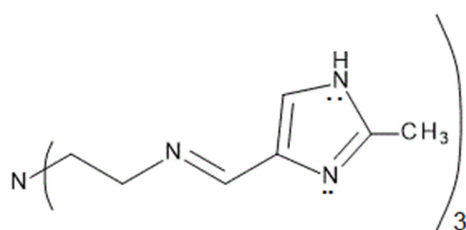

tren(2Me-4ImH)<sub>3</sub>

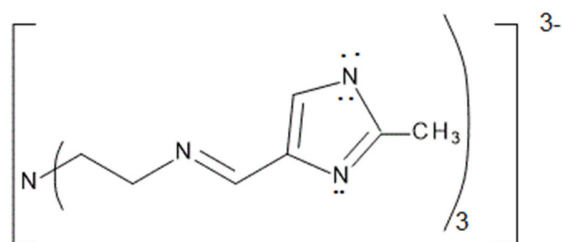

[tren(2Me-4Im)<sub>3</sub>]<sup>3-</sup>

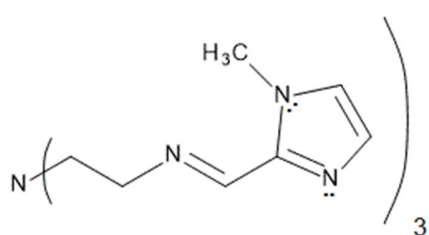

tren(1Me-2Im)<sub>3</sub>

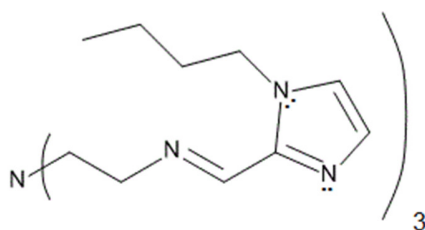

tren(1Bu-2Im)<sub>3</sub>

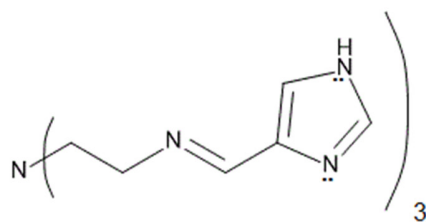

tren(4ImH)<sub>3</sub>

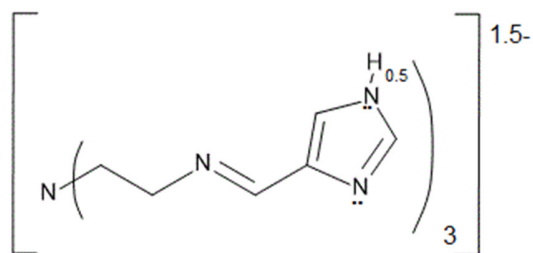

[tren(4ImH<sub>0.5</sub>)<sub>3</sub>]<sup>1.5-</sup>  
hemideprotonated

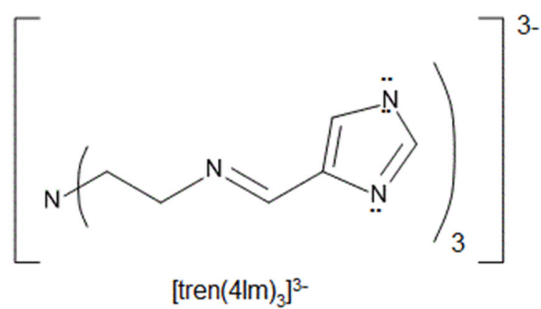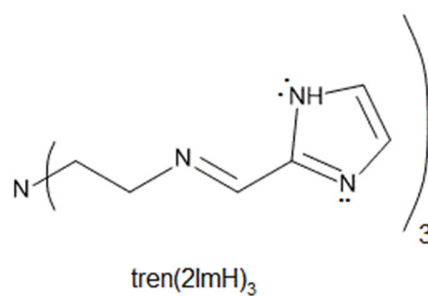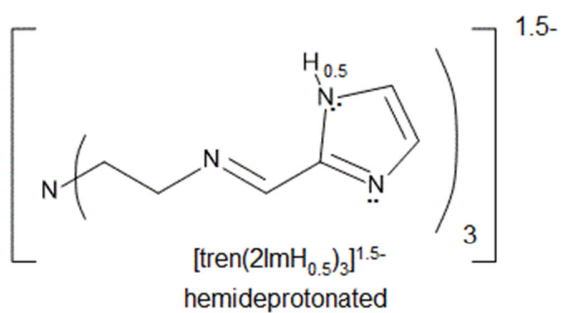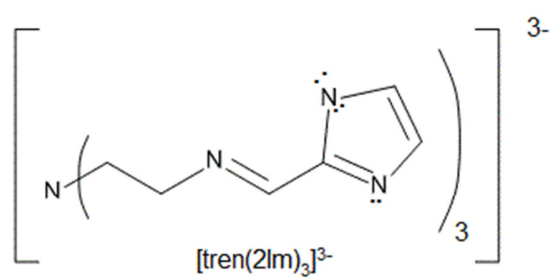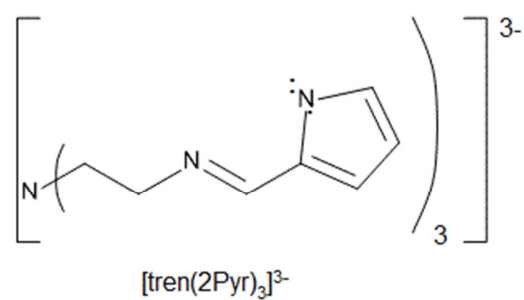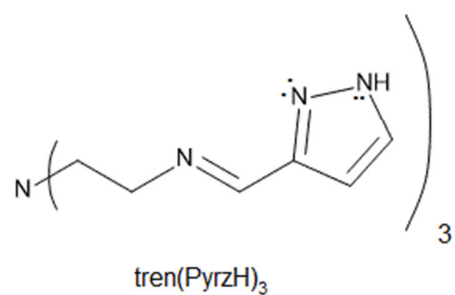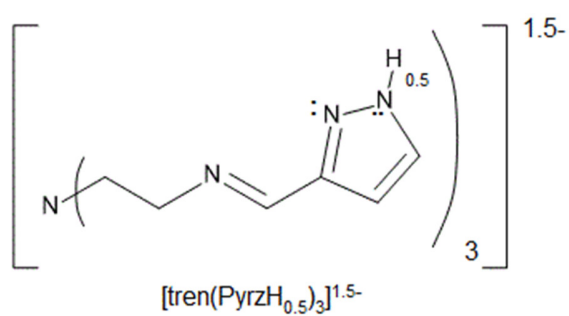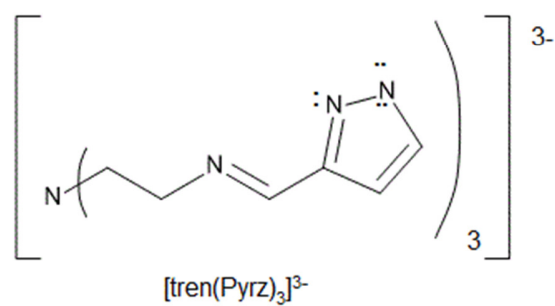

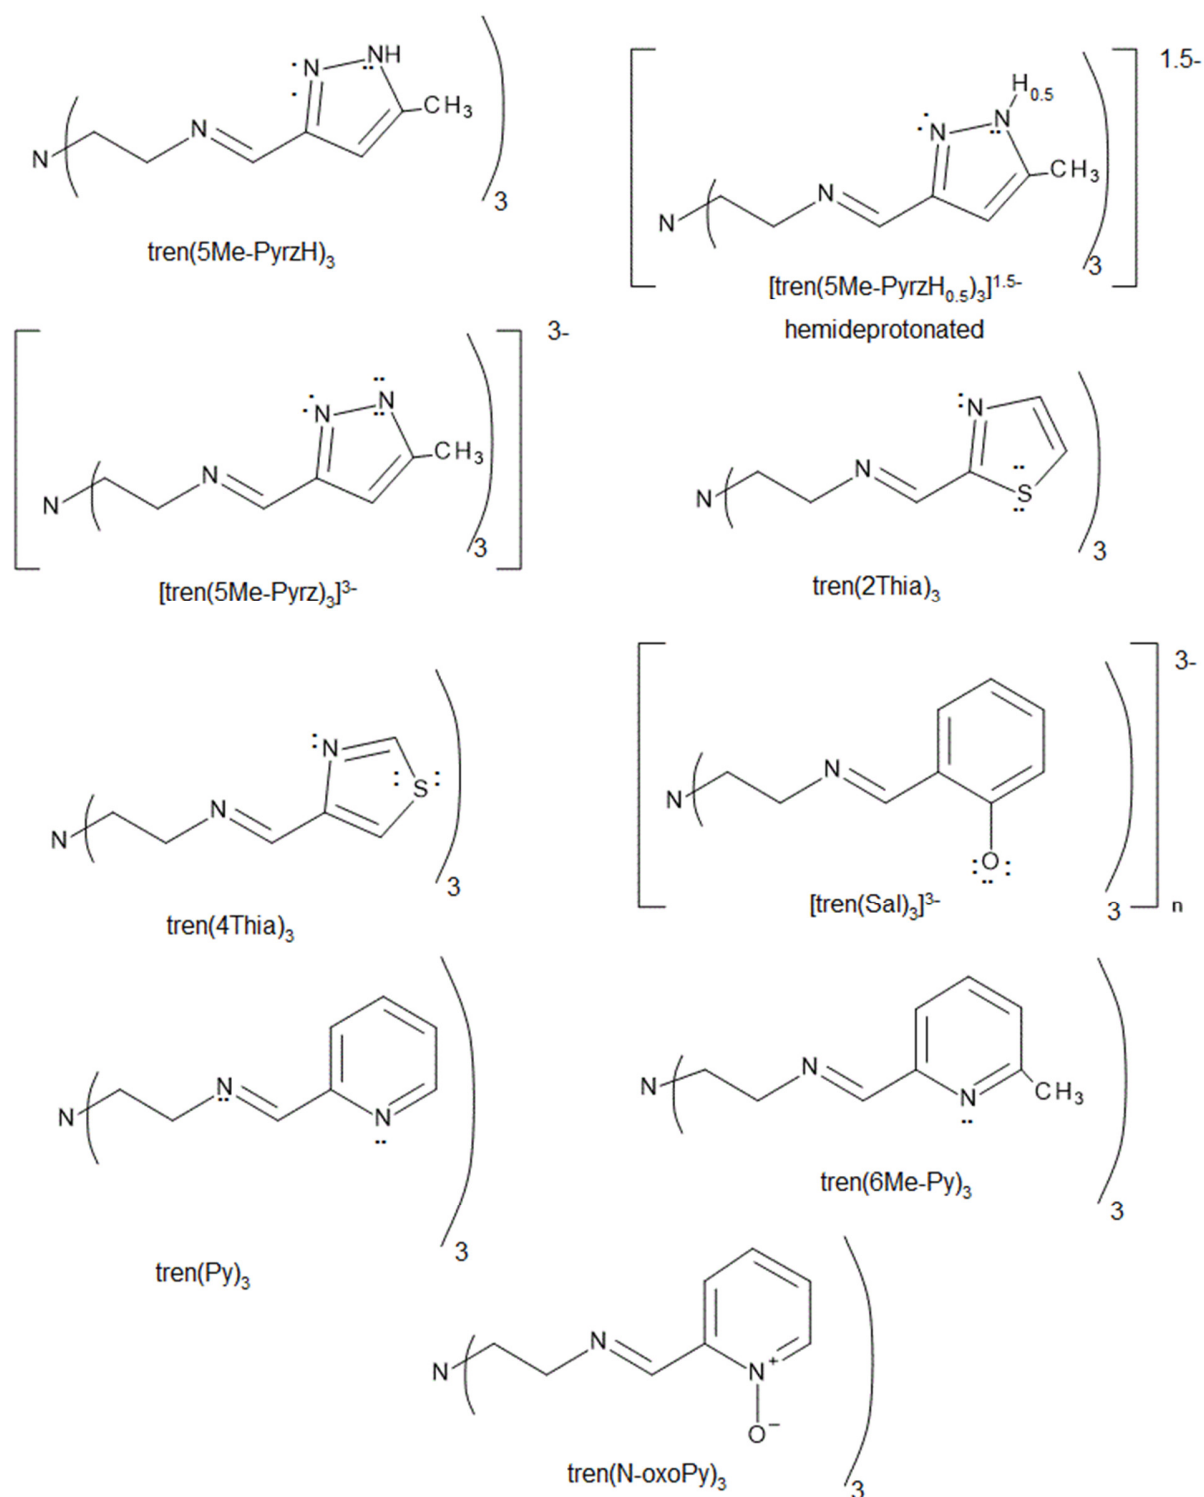

Figure S1. Line drawings of ligands used.
